# Supplementary material
Source: PubMed Central journal article supplement (PMC3760062)
Supplement: Supp_Fig1.pdf [file Supp_Fig1.pdf]

## Supplementary Data

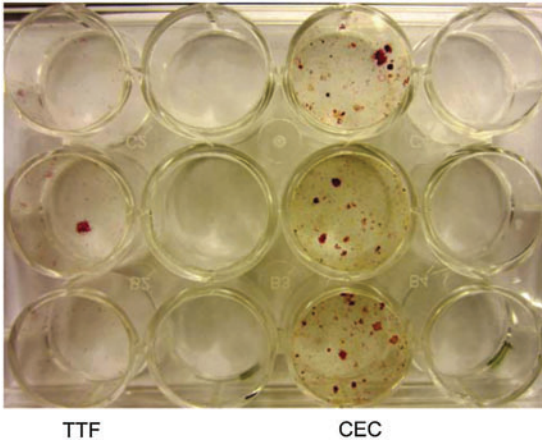

**SUPPLEMENTARY FIG. S1.** Alkaline phosphatase staining results of 4F2A mice-derived tail-tip fibroblasts (TTFs) and ciliary body epithelial cells (CECs) induced by doxycycline at day 25.
