# Supplementary material
Source: PubMed Central journal article supplement (PMC3760062)
Supplement: Supp_Fig2.pdf [file Supp_Fig2.pdf]

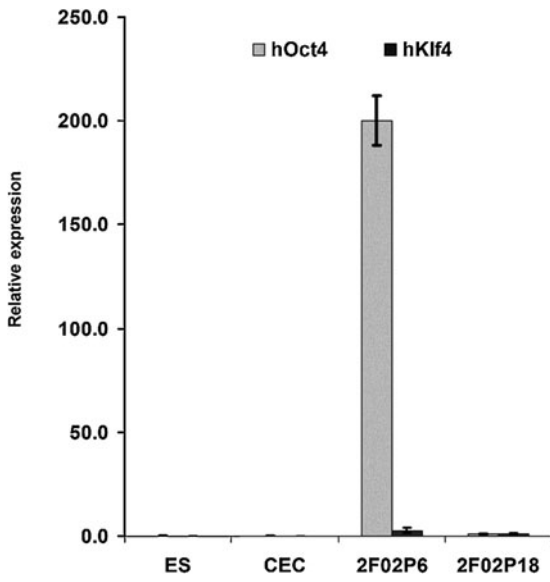

**SUPPLEMENTARY FIG. S2.** Expression of the transgenes hOct4 and hKlf4 is significantly attenuated in late passage 2F02 induced pluripotent stem (iPS) cells. RT-qPCR for the mRNAs of viral hOct4 and hKlf4 in wild-type CEC, mouse embryonic stem (ES) E14 line, and 2F02 iPS cells at passage 6 (2F02p6) and passage 18 (2F02P18).
