# Supplementary material
Source: PubMed Central journal article supplement (PMC3760062)
Supplement: Supp_Fig3.pdf [file Supp_Fig3.pdf]

2F01

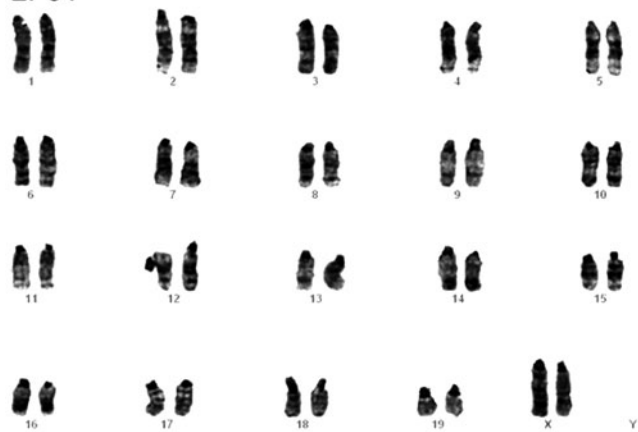

2F02

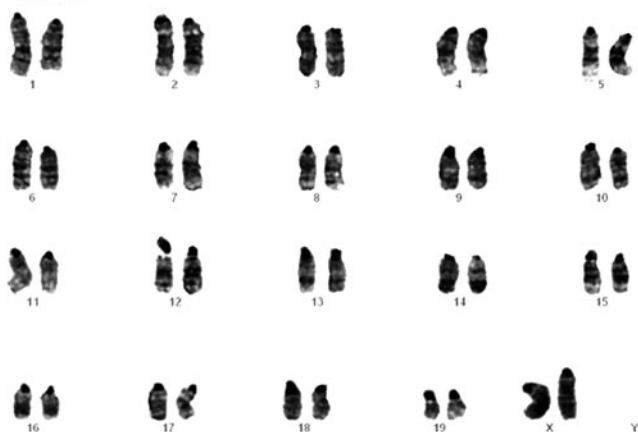

**SUPPLEMENTARY FIG. S3.** Karyotyping analysis in two wild-type CEC-derived iPS cell lines 2F01 and 2F02 revealed their female karyotypes with normal chromosomal stability/integrity.
