# Supplementary material
Source: PubMed Central journal article supplement (PMC3760062)
Supplement: Supp_Fig4.pdf [file Supp_Fig4.pdf]

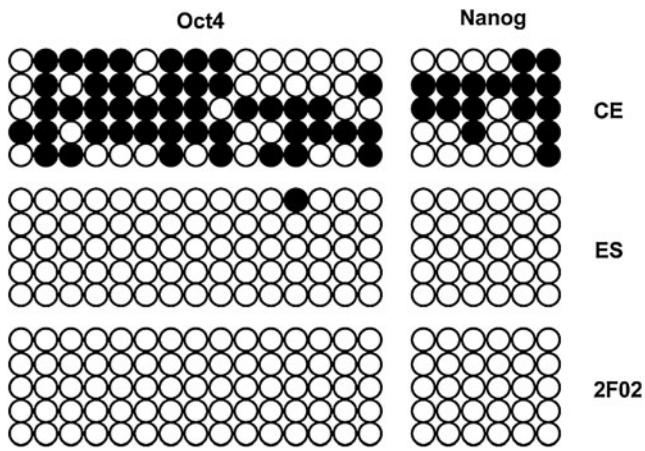

**SUPPLEMENTARY FIG. S4.** Methylation analysis of the Oct4 and Nanog promoters in wild-type CECs, ES, and 2F02 iPS cells. Bisulfite sequencing of the Oct3/4 and Nanog promoters revealed that CpGs in the parental CECs were converted to a demethylated state in the 2F02 iPS cells, resulting in a methylation pattern similar to that of mouse ES cells.
