# Supplementary material
Source: PubMed Central journal article supplement (PMC3760062)
Supplement: Supp_Fig5.pdf [file Supp_Fig5.pdf]

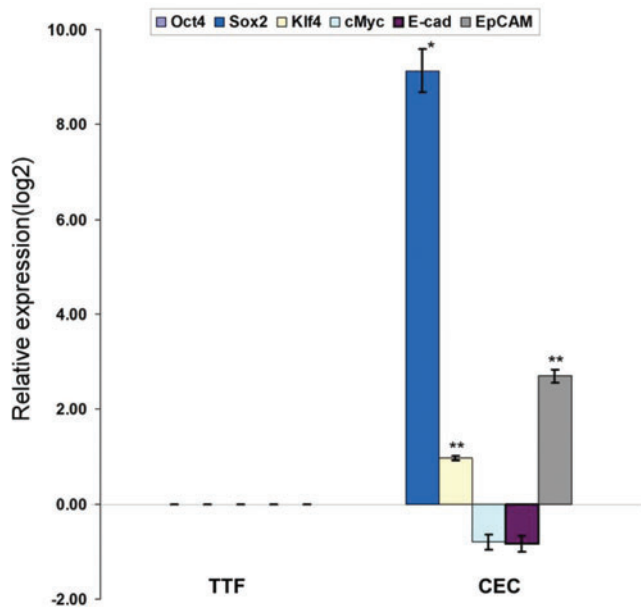

**SUPPLEMENTARY FIG. S5.** CECs expressed relatively high levels of Sox2 and EpCAM compared with TTFs. RT-qPCR for the mRNAs of Oct4, Sox2, Klf4, cMyc, E-cadherin, and EpCAM in mouse TTFs and CECs. Data are normalized for GAPDH expression and presented as mean±SEM for three replicates. \**P* value<0.01; \*\**P* value<0.05.
