# Supplementary material
Source: PubMed Central journal article supplement (PMC3760062)
Supplement: Supp_Table1.pdf [file Supp_Table1.pdf]

SUPPLEMENTARY TABLE S1. PRIMERS USED FOR PCR ANALYSES

| <i>Genomic PCR</i>             |                                                                         |
|--------------------------------|-------------------------------------------------------------------------|
| Klf4                           | CAGAGGAGCCCAAGCCAAAG<br>CTTGTGTAGCGCCAAGTGCC                            |
| c-Myc                          | GCCACAGCAAACCTCCTCAC<br>CTTGTGTAGCGCCAAGTGCC                            |
| Sox2                           | ATGGGTTCCGGTGGTCAAGTC<br>CTTGTGTAGCGCCAAGTGCC                           |
| Oct3/4                         | GTGGTCCGAGTGTGGTTCTG<br>CTTGTGTAGCGCCAAGTGCC                            |
| Methylation analysis of Oct3/4 | GGTTTTTAGAGGATGGTTGAGTG<br>TCCAACCCTACTAACCATCACC                       |
| Methylation analysis of Nanog  | GATTTTGTAGGTGGGATTAAT<br>TGTGAATTT<br>ACCAAAAAAACCACACTCA<br>TATCAATATA |

*RT-PCR*

|             |                                                                     |
|-------------|---------------------------------------------------------------------|
| GAPDH       | TTCCAGTATGACTCCACTCACG<br>GGATGCAGGGATGATGTTCT                      |
| Klf4        | CTGGCCATCGGACCTACTTAT<br>TCACGCCAACGGTTAGTCG                        |
| c-Myc       | GAGCTGTTTGAAGGCTGGATTC<br>AAGGACGTAGCGACCGCAAC                      |
| Sox2        | ATGGCCCAGCACTACCAGAG<br>CGAAGCGCCTAACGTACCAC                        |
| Oct3/4      | CCCCAATGCCGTGAAGTTGGA<br>GAAGGT<br>TCTCTAGCCCAAGCTGATTGG<br>CGATGTG |
| Nanog       | AAGTCCTGAGGCTGACAAGG<br>GGGATACTCCACTGGTGCTG                        |
| Rex1        | GCAGGATCGCCTCACTGTGCTG<br>TCTGGACTGGCCTTGCCTCGTC                    |
| Nefl        | AGACATTAGCGCCATGCAGGACA<br>AGCCACTGTAAGCAGAACGGCC                   |
| Nestin      | GTTCCAGCTGGCTGTGGAAGCC<br>GCCAAGGTGGGGTTCTGGC                       |
| KDR         | CGGACCGTTAAGCGGGCCAAT<br>GCTTGGTGCAGGCGCCTAGG                       |
| FLT1        | CCCCAAAGAGAGGCCCCCGGT<br>TGGCCCTCGGCAGATCGGAA                       |
| Brachyury   | CGAACTGCGAGTGGGCCTGG<br>ATGTAGACGCAGCTGGGCGC                        |
| Foxa2       | AGCAGCGGCCAGCGAGTTAA<br>AGCGACGGGCTCATTCCAGC                        |
| GATA4       | CCATGGGGTTCACAGGCCTCT<br>ACTTTGCTGGCCCCACGTC                        |
| KRT18       | TTGCCCGGATGACTTTAGA<br>ATGTCCGCCATGATCTTGCT                         |
| CX43        | TGAGGGAAGTACCCAACAGC<br>CACGTGAGCCAAGTACAGGA                        |
| E-cad       | CAGGTCCTCATGGCTTTGC<br>CTTCCGAAAAGAAGGCTGTCC                        |
| Palmdelphin | CTGCAAAGAGCGGATTTCTC<br>TGCTGGTCTTGCTGATTTTG                        |

*qRT-PCR*

|       |                                               |
|-------|-----------------------------------------------|
| Klf4  | AACATGCCCGGACTTACAAA<br>TTCAAGGGAATCCTGGTCTTC |
| c-Myc | TAACTCGAGGAGGAGCTGGA<br>GCCAAGGTTGTGAGGTTAGG  |

SUPPLEMENTARY TABLE S1. (CONTINUED)

*qRT-PCR*

|                 |                                                 |
|-----------------|-------------------------------------------------|
| Sox2            | GCGGAGTGGAAACTTTTGTC<br>GGGAAGCGTGTACTTATCCTTCT |
| Oct3/4          | TAGGTGAGCCGCTTTCCAC<br>GCTTAGCCAGGTTTCGAGGAT    |
| EpCAM           | CTGGCGTCTAAATGCTTGGC<br>CCTTGTCCGGTCTTCCGGACTC  |
| hOct4 transgene | CTGCACTGTACTCCTCGGTC<br>CTAAAGCGCATGCTCCAGAC    |
| hKlf4 transgene | AATTCGCCCCGCTCAGATGAA<br>TAAAGCGCATGCTCCAGACT   |

(continued)
