# Supplementary material
Source: PubMed Central journal article supplement (PMC3760062)
Supplement: Supp_Table2.pdf [file Supp_Table2.pdf]

SUPPLEMENTARY TABLE S2. ANTIBODIES USED  
FOR IMMUNOFLUORESCENCE STAINING

| <i>Primary antibodies</i>                  |                             |                    |
|--------------------------------------------|-----------------------------|--------------------|
| <i>Antigen</i>                             | <i>Manufacturer</i>         | <i>Catalog No.</i> |
| E-cadherin                                 | BD Biosciences              | 610181             |
| $\alpha$ -smooth muscle actin              | Sigma                       | A2574              |
| tubulin- $\beta$ III                       | Covance                     | PRB-278P           |
| Oct3/4                                     | Santa Cruz<br>Biotechnology | sc-5279            |
| Nanog                                      | ReproCell                   | RCAB002P-F         |
| Sox2                                       | Stemgent                    | 09-0024            |
| SSEA-1                                     | R&D Systems                 | sc-21702           |
| <i>Secondary antibodies</i>                |                             |                    |
| <i>Name</i>                                | <i>Manufacturer</i>         | <i>Catalog No.</i> |
| Alexa Fluor 594-labeled<br>anti-mouse IgG  | Invitrogen                  | A11032             |
| Alexa Fluor 594-labeled<br>anti-rabbit IgG | Invitrogen                  | A11307             |
